# Supplementary material for: Anti-Multiple Myeloma Potential of Secondary Metabolites from Hibiscus sabdariffa—Part 2
Source: MDPI journal article supplement (doi:10.3390/molecules26216596), 2021-10-31
Supplement: s1 [file s1]

# Anti-Multiple Myeloma Potential of Secondary metabolites from *Hibiscus sabdariffa* - Part 2

Alessio Malacrida, Valeria Cavalloro, Emanuela Martino, Giosuè Costa, Francesca Alessandra Ambrosio, Stefano Alcaro, Roberta Rigolio, Arianna Casseti, Mariarosaria Miloso, and Simona Collina

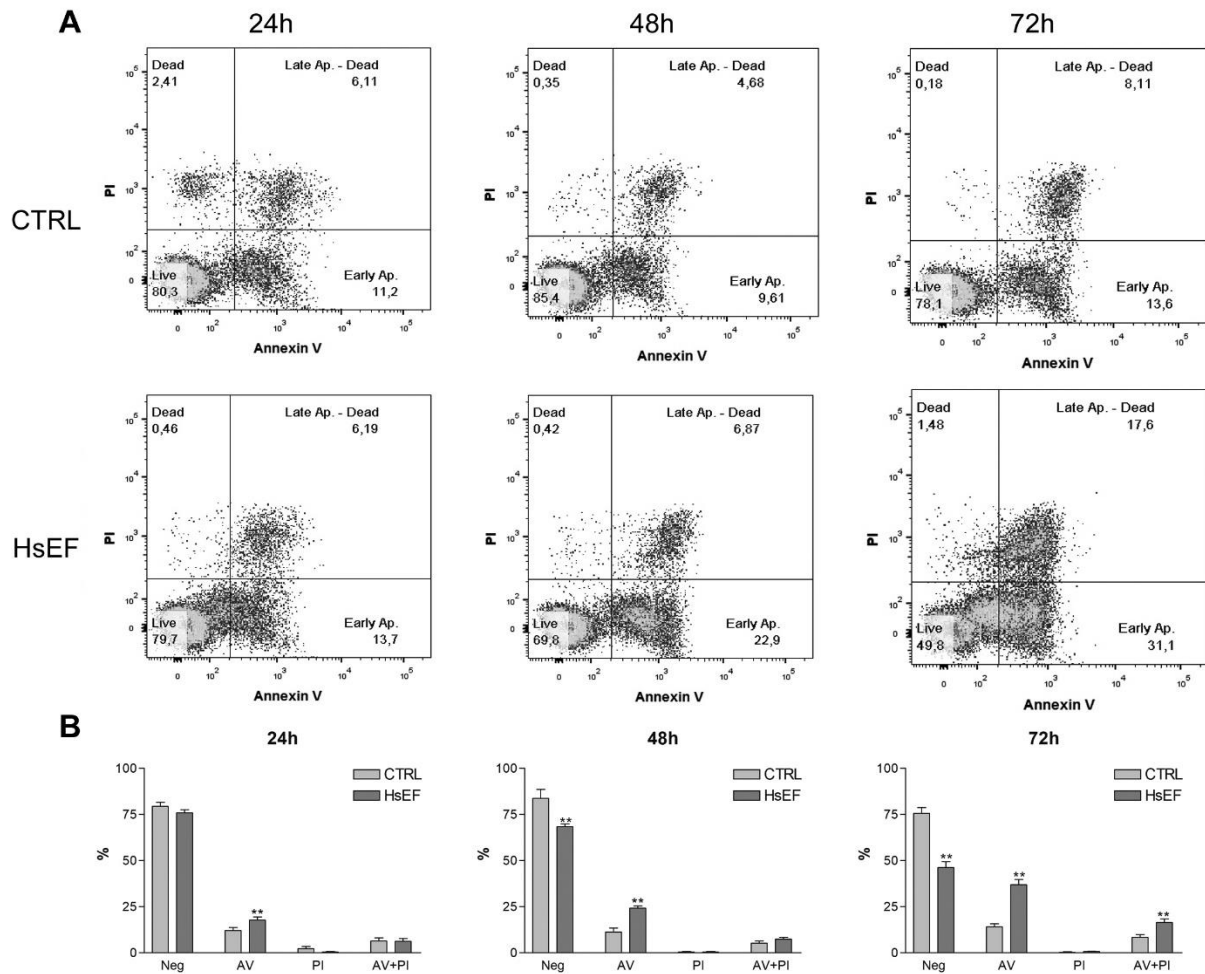

**Supplementary Figure S1.** Annexin V and Propidium Iodide staining of RPMI 8226 cells. (A) Representative dot-plots of FACS analysis of RPMI 8226 cells treated with HsEF or not treated for 24, 48 and 72 hours, and stained with Annexin V and Propidium Iodide. (B) Graphs represent the percentage of cells negative to Annexin V and Propidium Iodide (Neg), positive only to Annexin V (AV), positive only to Propidium Iodide (PI), or positive to both Annexin V and Propidium Iodide (AV+PI).  $p < 0.01$  vs CTRL.
